# Supplementary material
Source: Springer Nature journal article supplement (https://www.springermedizin.de/resource/supplementary/12967_2010_950_MOESM12_ESM.pdf/9577246)
Supplement: MOESM12 [file 9577246]

**H&E**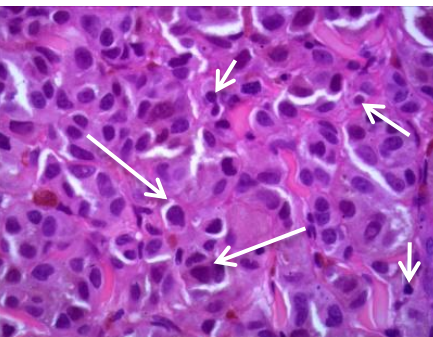**A** Baseline**FoxP3**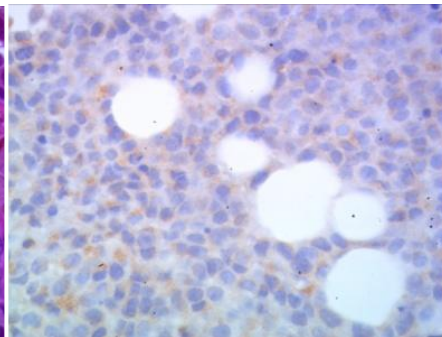**C** Non-Benefit group**IDO**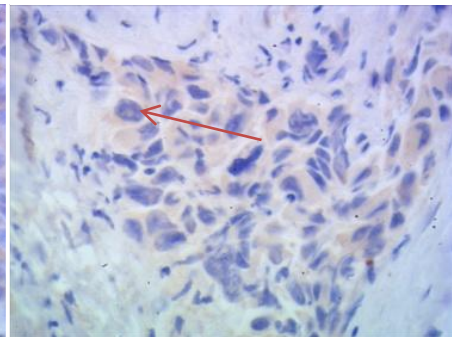**E** Non-Benefit group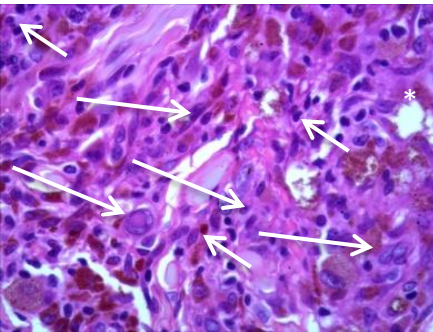**B** Post-treatment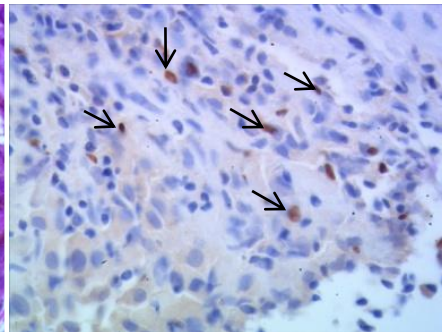**D** Benefit group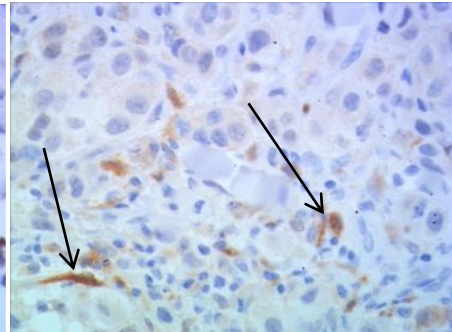**F** Benefit group
